# Supplementary material
Source: PubMed Central journal article supplement (PMC6954981)
Supplement: NIHMS1546151-supplement-1.pdf [file NIHMS1546151-supplement-1.pdf]

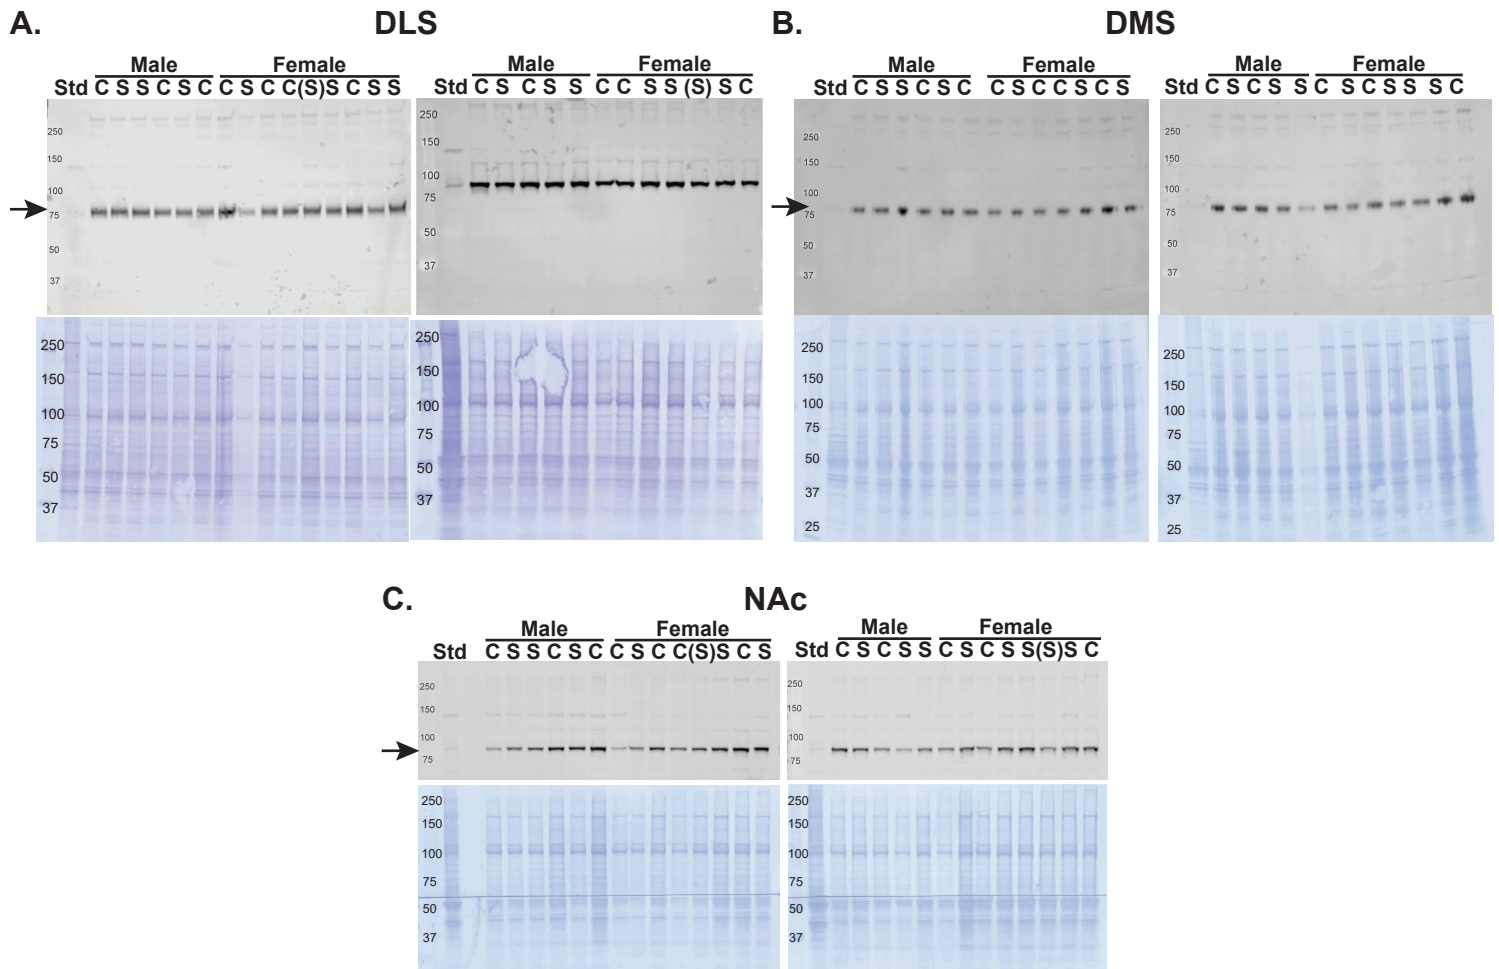

**Supplemental Figure 1. Full-length images of striatal Western blot membranes.** (A) PDE10A (top) and Coomassie (bottom) stained membranes from dorsolateral striatum. (B) PDE10A (top) and Coomassie (bottom) stained membranes from dorsomedial striatum. (C) PDE10A (top) and Coomassie (bottom) stained membranes from nucleus accumbens. Numbers to the left of membranes indicate molecular weight markers (in kDa), while sample labels are located above each lane, with sex (male or female) plus treatment group (C, Control; S, Stress History) or Std (standard brain lysate) indicated. Labels surrounded by parentheses denote samples excluded from analyses due to failure to learn the operant task. Arrow indicates quantified PDE10A band of approximately 88 kDa.

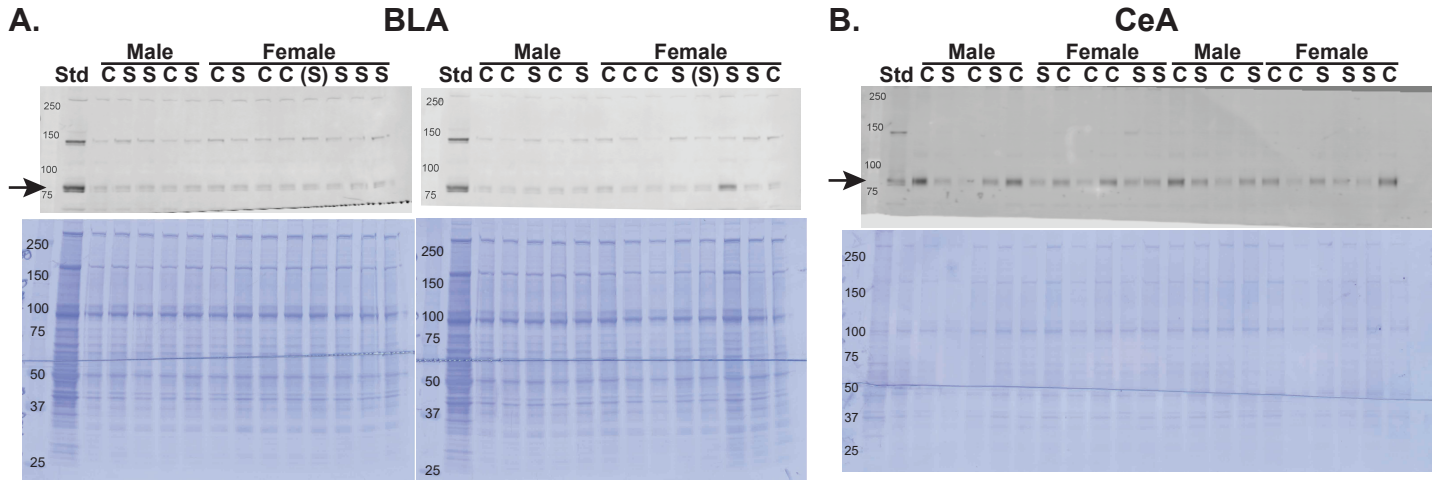

**Supplemental Figure 2. Full-length images of amygdala Western blot membranes.** (A) PDE10A (top) and Coomassie (bottom) stained membranes from basolateral amygdala. (B) PDE10A (top) and Coomassie (bottom) stained membranes from central amygdala. Numbers to the left of membranes denote molecular weight markers (in kDa), and sample labels are located above each lane, with sex (male or female) plus treatment group (C, Control; S, Stress History) or Std (standard brain lysate) indicated. Labels enclosed by parentheses denote samples excluded from analyses due to failure to learn the operant task. Arrow indicates quantified PDE10A band of approximately 88 kDa.

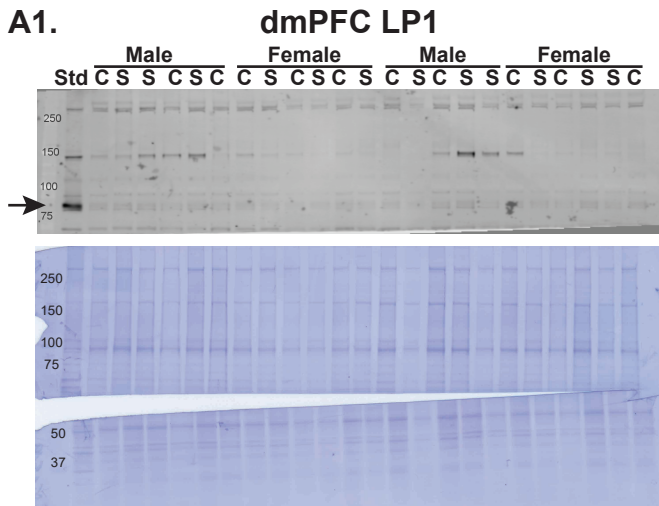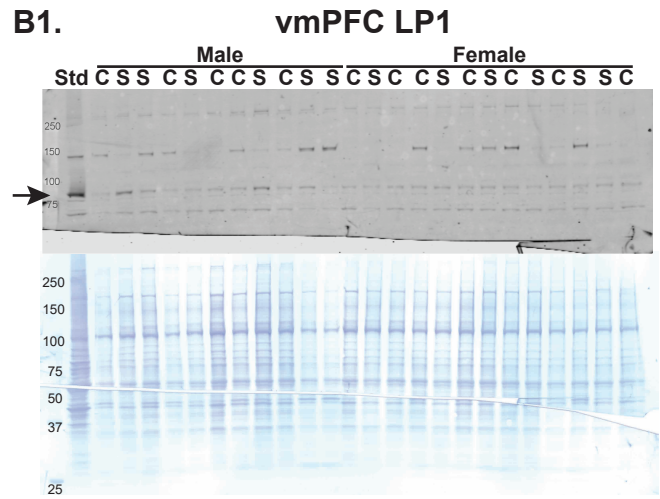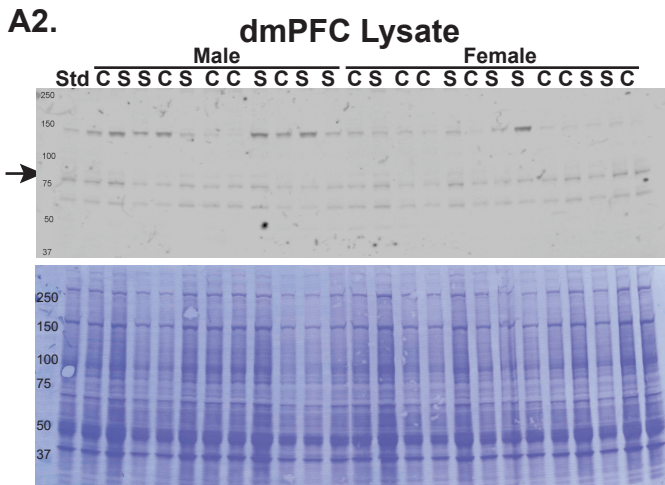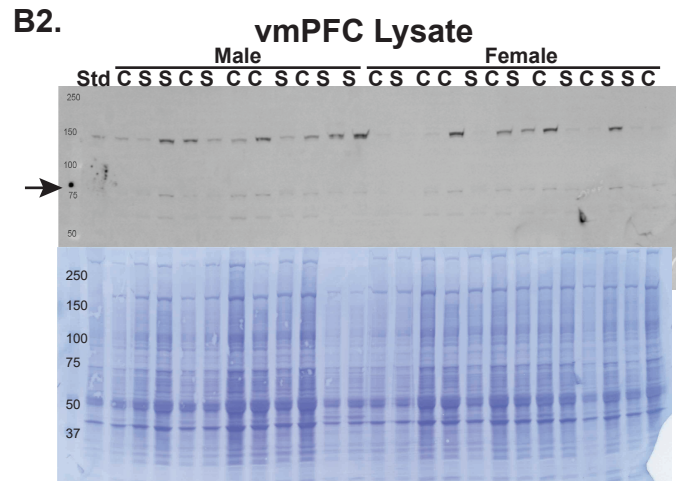

**Supplemental Figure 3. Full-length images of medial prefrontal cortex Western blot membranes.** (A) PDE10A (top) and Coomassie (bottom) stained membranes from dorsomedial prefrontal cortex (dmPFC) LP1 fractions (A1) and lysate (A2). (B) PDE10A (top) and Coomassie (bottom) stained membranes from ventromedial prefrontal cortex (vmPFC) LP1 fractions (B1) and lysate (B2). Numbers to the left of membranes denote molecular weight markers (in kDa), and sample labels are located above each lane, with sex (male or female) plus treatment group (C, Control; S, Stress History) or Std (standard brain lysate) indicated. Arrow indicates quantified PDE10A band of approximately 88 kDa.
